# Supplementary material
Source: MDPI journal article supplement (https://www.mdpi.com/2571-6131/6/4/135)
Supplement: s1 [file s1]

**Table S1.** Temper characteristics of each ceramic sample including mineral inclusions, rock fragments and distinctive particulates identified by Optical Microscopy.

| Sample | PF | Mineralogy                                                                                                                                             | Rock Fragments                                                    | Observations                                                        |
|--------|----|--------------------------------------------------------------------------------------------------------------------------------------------------------|-------------------------------------------------------------------|---------------------------------------------------------------------|
| EVR-1  | 1  | Quartz, plagioclase feldspar, amphibole, opaque minerals, biotite                                                                                      | Fragments of acid and mafic plutonic rocks                        |                                                                     |
| EVR-2  | 6  | Quartz, plagioclase feldspar (rare), muscovite, amphibole (brown), K-rich feldspar                                                                     | Quartzite, greywacke, chert                                       | Very rich in small crystals of muscovite mixed in the ceramic paste |
| EVR-3  | 2  | Quartz, plagioclase feldspar, muscovite (rare), amphibole (rare), K-rich feldspar                                                                      | Fragments of granitic rock (felsic), quartzite, sandstone         | Big lime nodules. Highly heterogenous ceramic matrix                |
| EVR-4  | 1  | Quartz, plagioclase feldspar, amphibole, opaque minerals, biotite                                                                                      | Fragments of acid and mafic plutonic rocks                        |                                                                     |
| EVR-5  | 1  | Quartz, plagioclase feldspar, amphibole, opaque minerals, biotite, pyroxene (rare), K-rich feldspar (rare)                                             | Fragments of acid and mafic plutonic rocks                        |                                                                     |
| EVR-6  | 1  | Quartz, plagioclase feldspar, amphibole, opaque minerals, biotite, pyroxene (rare), K-rich feldspar (rare)                                             | Fragments of acid and mafic plutonic rocks                        |                                                                     |
| EVR-7  | 1  | Quartz, plagioclase feldspar, amphibole, opaque minerals, biotite, pyroxene (rare), K-rich feldspar (rare)                                             | Fragments of acid and mafic plutonic rocks                        |                                                                     |
| EVR-8  | 1  | Quartz, plagioclase feldspar, amphibole, opaque minerals, biotite, pyroxene (rare), K-rich feldspar (rare)                                             | Fragments of acid and mafic plutonic rocks                        |                                                                     |
| EVR-9  | 1  | Quartz, plagioclase feldspar, amphibole, opaque minerals, biotite, pyroxene (rare), K-rich feldspar (rare)                                             | Fragments of acid and mafic plutonic rocks                        |                                                                     |
| EVR-10 | 1  | Quartz, plagioclase feldspar, amphibole, opaque minerals, biotite, pyroxene (rare), K-rich feldspar (rare)                                             | Fragments of acid and mafic plutonic rocks                        |                                                                     |
| EVR-11 | 3  | Quartz, plagioclase feldspar (rare), muscovite (rare), K-rich feldspar                                                                                 | Quartzite, frag. of sandstone and granitic rock                   | Clay pellets, lime nodules.                                         |
| EVR-12 | 4  | Quartz, plagioclase feldspar, muscovite (rare), biotite, K-rich feldspar                                                                               | Limestone, schist                                                 | Bioclast (bivalves)                                                 |
| EVR-13 | 3  | Quartz, plagioclase feldspar (rare), muscovite (rare), K-rich feldspar                                                                                 | Quartzite, frag. of sandstone and granitic rock                   | Clay pellets, lime nodules.                                         |
| EVR-14 | 2  | Quartz, plagioclase feldspar (rare), muscovite, K-rich feldspar                                                                                        | Quartzite, frag. of sandstone and granitic rock (felsic)          | Big lime inclusions. Highly heterogenous ceramic matrix             |
| EVR-15 | 2  | Quartz, plagioclase feldspar, muscovite (rare), K-rich feldspar                                                                                        | Quartzite, sandstone                                              | Highly heterogenous ceramic matrix                                  |
| EVR-16 | 5  | Quartz, plagioclase feldspar (rare), muscovite (rare), amphibole (rare), biotite (rare), pyroxene (rare), K-rich feldspar, calcite (thermally altered) | Quartzite, micritic limestone (thermally altered), schist, gneiss | Secondary calcite in porosity                                       |
| EVR-17 | 3  | Quartz, plagioclase feldspar (rare), muscovite (rare), amphibole                                                                                       | Quartzite, frag. of sandstone and granitic rock (felsic)          | Clay pellets                                                        |
| EVR-18 | 2  | Quartz, plagioclase feldspar (rare), muscovite (rare), K-rich feldspar                                                                                 | Quartzite, frag. of sandstone and granitic rock (felsic)          | Clay pellets, big lime inclusions                                   |
| MER-19 | 6  | Quartz, plagioclase feldspar (rare), muscovite, amphibole (brown), K-rich feldspar                                                                     | Quartzite, greywacke, chert                                       | Very rich in small crystals of muscovite mixed in the ceramic paste |
| MER-21 | 2  | Quartz, plagioclase feldspar (rare), muscovite (rare), amphibole (rare), K-rich feldspar                                                               | Quartzite                                                         | Big lime inclusions. Highly heterogenous ceramic matrix             |
| MER-22 | 2  | Quartz, plagioclase feldspar, muscovite (rare), K-rich feldspar                                                                                        | Quartzite, frag. of sandstone and granitic rock (felsic)          | Highly heterogenous ceramic matrix                                  |
| MER-23 | 2  | Quartz, plagioclase feldspar (rare), amphibole (rare), K-rich feldspar                                                                                 | Quartzite, frag. of sandstone and granitic rock (felsic)          | Highly heterogenous ceramic matrix                                  |
| MER-24 | 5  | Quartz, plagioclase feldspar (rare), muscovite, biotite (rare), feldspar, calcite (thermally altered)                                                  | Limestone (thermally altered), gneiss                             | Secondary calcite in porosity                                       |
| SIL-25 | 3  | Quartz, plagioclase feldspar (rare), muscovite, amphibole (brown, rare), K-rich                                                                        | Quartzite, frag. of sandstone and granitic rock,                  | Secondary calcite in porosity, bioclast                             |

| Sample PF |   | Mineralogy                                                                        | Rock Fragments                                  | Observations                                                                             |
|-----------|---|-----------------------------------------------------------------------------------|-------------------------------------------------|------------------------------------------------------------------------------------------|
|           |   | feldspar                                                                          | thermally altered limestone                     | (bivalves), clay pellets                                                                 |
| SIL-26    | 3 | Quartz, plagioclase feldspar (rare), muscovite, amphibole (rare), K-rich feldspar | Quartzite, frag. of sandstone and granitic rock | Clay pellets, lime nodules.                                                              |
| SIL-27    | 2 | Quartz, plagioclase feldspar (rare), muscovite (rare), K-rich feldspar            | Quartzite, frag. of sandstone and granitic rock | Clay pellets, lime nodules. Highly heterogeneous ceramic matrix                          |
| SIL-28    | 6 | Quartz, plagioclase feldspar (rare), muscovite, K-rich feldspar                   | Greywacke, chert                                | Very rich in small crystals of muscovite mixed in the ceramic paste, vitreous inclusions |
| SIL-29    | 6 | Quartz, plagioclase feldspar (rare), muscovite, K-rich feldspar                   | Quartzite, greywacke, chert                     | Very rich in small crystals of muscovite mixed in the ceramic paste, vitreous inclusions |

**Table S2.** Petrographic description of each ceramic sample according to main characteristics of the **Ceramic Paste** (Colour, Homogeneity/Hom. or Heterogeneity/Het. Matrix: highly homogeneous/H. Hom., moderately homogeneous/M. Hom., slightly homogeneous/S. Hom., highly heterogeneous/H. Het., moderately heterogeneous/M. Het., slightly heterogeneous/S. Het. – Fe-Ca rich Matrix: Fe-rich/Fe, slightly calcitic/S. Ca, moderately calcitic/M. Ca, highly calcitic/H. Ca – Matrix Activity: slightly active/S, moderately active/M, highly active/H, isotropic/I – Relative Abundance (%) of the Clay Matrix). **Porosity** (Description and Relative Abundance (%) of Voids). **Temper** (Grain Shape: mainly equant (rounded) and elongated grains/Eq & El, mainly elongated and equant (rounded) grains/El & Eq – Roundness: very angular/VA, angular/A, subangular/SA, subrounded/SR, rounded/R, well rounded/WR – Packing: close-spaced/CS, single-spaced/SS, double-spaced/DS, open-spaced/OS – Maximum Grain Size (µm) – Alignment – Sorting – Grain Size Distribution (G.S.D.) – Relative Abundance (%) of the Temper).

| Sample | Pottery Fabric (PF) | Table of ceramic paste, porosity and temper description of samples |                    |                     |                 |       |                                                               |       |             |           |         |              |           |           |          |       |
|--------|---------------------|--------------------------------------------------------------------|--------------------|---------------------|-----------------|-------|---------------------------------------------------------------|-------|-------------|-----------|---------|--------------|-----------|-----------|----------|-------|
|        |                     | Ceramic Paste                                                      |                    |                     |                 |       | Porosity                                                      |       |             | Temper    |         |              |           |           |          |       |
|        |                     | Colour                                                             | Hom. – Het. Matrix | Fe – Ca rich Matrix | Matrix Activity | %     | Description of Voids                                          | %     | Grain Shape | Roundness | Packing | Max. size µm | Alignment | Sorting   | G.S.D.   | %     |
| EVR-1  | PF1                 | Brown                                                              | H. Hom.            | Fe                  | S               | 81.81 | Meso-macro vughs and elongate voids                           | 6.65  | Eq&El       | VA-SR     | CS      | 754          | Weak      | Very Poor | Bimodal  | 11.54 |
| EVR-2  | PF6                 | Red-Buffy                                                          | M. Hom.            | S.Ca                | I               | 91.75 | Meso-mega vughs and meso elongate voids                       | 1.56  | Eq&El       | SA-SR     | SS      | 1160         | Weak      | Moderate  | Unimodal | 6.68  |
| EVR-3  | PF2                 | Brown - Red                                                        | M. Het.            | S.Ca                | I               | 83.79 | Meso-mega vughs and meso vesicles                             | 4.34  | Eq&El       | SA-SR     | CS      | 1082         | Weak      | Moderate  | Unimodal | 11.87 |
| EVR-4  | PF1                 | Brown                                                              | H. Hom.            | Fe                  | I               | 77.93 | Meso-macro vughs and meso elongate voids                      | 5.16  | Eq&El       | VA-SA     | CS      | 1582         | Weak      | Very Poor | Unimodal | 16.91 |
| EVR-5  | PF1                 | Brown                                                              | H. Hom.            | Fe                  | I               | 80.14 | Meso-macro vughs and meso elongate voids                      | 5.85  | Eq&El       | VA-SA     | CS      | 1107         | Weak      | Very poor | Unimodal | 14.02 |
| EVR-6  | PF1                 | Brown                                                              | M. Hom.            | Fe                  | I               | 74.79 | Meso-mega vughs and meso-micro elongate voids (channels)      | 9.56  | Eq&El       | VA-SA     | CS      | 1113         | Weak      | Very Poor | Unimodal | 15.65 |
| EVR-7  | PF1                 | Brown                                                              | H. Hom.            | Fe                  | S               | 79.90 | Meso-macro vughs and elongate voids                           | 8.10  | Eq&El       | VA-SA     | CS      | 1825         | Weak      | Very Poor | Unimodal | 12    |
| EVR-8  | PF1                 | Brown                                                              | H. Hom.            | Fe                  | S               | 77.95 | Meso vughs and meso elongate voids                            | 7.24  | Eq&El       | VA-SA     | Cs      | 1435         | Weak      | Very poor | Unimodal | 14.81 |
| EVR-9  | PF1                 | Red-Buffy                                                          | M. Het.            | S.Ca                | I               | 80.10 | Meso-mega vughs and elongate voids                            | 6.55  | Eq&El       | A-SA      | SS      | 1204         | Weak      | Very Poor | Bimodal  | 13.35 |
| EVR-10 | PF1                 | Brown                                                              | H. Hom.            | Fe                  | S               | 73.86 | Meso-mega vughs and elongate voids                            | 10.84 | Eq&El       | VA-SA     | CS      | 896          | Weak      | Very Poor | Unimodal | 15.30 |
| EVR-11 | PF3                 | Buffy                                                              | M. Hom.            | H.Ca                | I               | 93.08 | Meso-macro vughs and meso elongate voids                      | 0.97  | Eq&El       | SA-SR     | SS      | 912          | Weak      | Moderate  | Unimodal | 5.95  |
| EVR-12 | PF4                 | Buffy                                                              | H. Hom.            | H.Ca                | I               | 95.42 | Meso elongate voids and vughs                                 | 1.13  | Eq&El       | A-SA      | DS      | 954          | Weak      | Moderate  | Unimodal | 3.5   |
| EVR-13 | PF3                 | Buffy-Red                                                          | M. Hom.            | H.Ca                | S               | 90.56 | Meso-macro vughs and meso vesicles                            | 1.33  | Eq&El       | SA-SR     | SS      | 1899         | Weak      | Moderate  | Unimodal | 8.11  |
| EVR-14 | PF2                 | Brown/Red-buffy                                                    | S. Het.            | S.Ca                | I               | 93.50 | Meso-micro vughs and elongate voids                           | 1.35  | Eq&El       | VA-SA     | SS      | 117          | Weak      | Moderate  | Unimodal | 5.16  |
| EVR-15 | PF2                 | Brown - Red                                                        | M. Het.            | S.Ca                | I               | 83.50 | Meso-macro vesicles and macro elongate voids                  | 2.17  | Eq&El       | SA-SR     | CS      | 1321         | Weak      | Moderate  | Unimodal | 14.33 |
| EVR-16 | PF5                 | Buffy                                                              | M. Hom.            | H.Ca                | S               | 88.14 | Micro-meso vughs and meso elongate voids                      | 1.95  | Eq&El       | AS-SR     | SS      | 470          | Weak      | Moderate  | Unimodal | 9.91  |
| EVR-17 | PF3                 | Buffy                                                              | M. Hom.            | H.Ca                | I               | 92.26 | Meso-macro vughs and micro-meso vesicles                      | 0.61  | Eq&El       | SA-SR     | SS      | 939          | Weak      | Moderate  | Bimodal  | 7.12  |
| EVR-18 | PF2                 | Brown - Red                                                        | H. Het.            | H.Ca                | S               | 89.70 | Micro-meso vughs and micro-meso elongate voids                | 1.01  | Eq&El       | SA-SR     | SS      | 798          | Weak      | Moderate  | Unimodal | 9.30  |
| MER-19 | PF6                 | Red-Buffy                                                          | M. Hom.            | M.Ca                | I               | 90.47 | Meso-macro vughs, meso vesicles and meso-macro elongate voids | 4.16  | Eq&El       | SA-SR     | SS      | 770          | Weak      | Moderate  | Bimodal  | 5.37  |
| MER-21 | PF2                 | Brown - Red                                                        | M. Het.            | S.Ca                | I               | 90.37 | Meso-micro vughs, meso vesicles and meso-macro elongate voids | 2.63  | Eq&El       | A-SA      | SS      | 373          | Weak      | Moderate  | Unimodal | 6     |
| MER-22 | PF2                 | Brown - Red                                                        | H. Het.            | M.Ca                | I               | 87.53 | Meso vughs, vesicles and elongate voids                       | 0.92  | Eq&El       | VA-SR     | SS      | 1091         | Weak      | Moderate  | Unimodal | 11.54 |
| MER-23 | PF2                 | Brown - Red                                                        | M. Het.            | S.Ca                | S               | 86.16 | Micro-mega vughs and elongate voids                           | 1.50  | Eq&El       | VA-SA     | CS      | 958          | Weak      | Moderate  | Unimodal | 12.35 |
| MER-24 | PF5                 | Buffy                                                              | M. Hom.            | H.Ca                | I               | 95.92 | Meso-macro vughs, meso vesicles and elongate voids            | 2.03  | Eq&El       | A-SA      | SS      | 243          | Weak      | Moderate  | Unimodal | 2.04  |
| SIL-25 | PF3                 | Red-Buffy                                                          | M. Hom.            | H.Ca                | I               | 87.84 | Meso vesicles, meso-mega vughs and elongate voids             | 2.00  | Eq&El       | A-SA      | SS      | 346          | Weak      | Moderate  | Unimodal | 10.17 |
| SIL-26 | PF3                 | Buffy-Red                                                          | M. Hom.            | H.Ca                | I               | 92.82 | Meso vesicles, meso-macro vughs and elongate voids            | 2.27  | Eq&El       | A-SA      | SS      | 494          | Weak      | Moderate  | Bimodal  | 4.91  |
| SIL-27 | PF2                 | Brown - Red                                                        | H. Het.            | M.Ca                | I               | 88.44 | Meso vesicles, meso-macro vughs and elongate voids            | 1.43  | Eq&El       | A-SA      | SS      | 1718         | Weak      | Very Poor | Unimodal | 10.13 |

| Sample | Pottery Fabric (PF) | Table of ceramic paste, porosity and temper description of samples |                    |                     |                 |       |                                         |      |             |           |         |                         |           |          |         |      |  |
|--------|---------------------|--------------------------------------------------------------------|--------------------|---------------------|-----------------|-------|-----------------------------------------|------|-------------|-----------|---------|-------------------------|-----------|----------|---------|------|--|
|        |                     | Ceramic Paste                                                      |                    |                     |                 |       | Porosity                                |      |             |           |         | Temper                  |           |          |         |      |  |
|        |                     | Colour                                                             | Hom. – Het. Matrix | Fe – Ca rich Matrix | Matrix Activity | %     | Description of Voids                    | %    | Grain Shape | Roundness | Packing | Max. size $\mu\text{m}$ | Alignment | Sorting  | G.S.D.  | %    |  |
| SIL-28 | PF6                 | Red-Buffy                                                          | M. Hom.            | M.Ca                | I               | 94.44 | Meso-mega vughs and elongate voids      | 1.86 | Eq&El       | SA-SR     | SS      | 1892                    | Weak      | Moderate | Bimodal | 3.71 |  |
| SIL-29 | PF6                 | Red                                                                | S. Hom.            | S.Ca                | S               | 93.70 | Meso vesicles, vughs and elongate voids | 0.84 | Eq&El       | SA-SR     | SS      | 725                     | Weak      | Moderate | Bimodal | 5.46 |  |

**Table S3.** Chemical composition of samples ceramic pastes with the associated statistical error.

| Sample | Con.(wt%)/Stat. Err. | Na <sub>2</sub> O | MgO   | Al <sub>2</sub> O <sub>3</sub> | SiO <sub>2</sub> | P <sub>2</sub> O <sub>5</sub> | K <sub>2</sub> O | CaO   | TiO <sub>2</sub> | Fe <sub>2</sub> O <sub>3</sub> | MnO    | LOI   |
|--------|----------------------|-------------------|-------|--------------------------------|------------------|-------------------------------|------------------|-------|------------------|--------------------------------|--------|-------|
| EVR 1  | Con.                 | 2.03              | 3.14  | 18.67                          | 52.85            | 0.22                          | 1.13             | 4.73  | 1.33             | 7.81                           | 0.14   | 7.72  |
|        | Stat. Err.           | 0.004             | 0.002 | 0.002                          | 0.002            | 0.0002                        | 0.003            | 0.002 | 0.001            | 0.001                          | 0.0002 |       |
| EVR2   | Con.                 | 0.63              | 2.45  | 14.32                          | 57.75            | 0.42                          | 2.88             | 9.9   | 0.75             | 5.37                           | 0.13   | 3.89  |
|        | Stat. Err.           | 0.004             | 0.002 | 0.002                          | 0.002            | 0.0002                        | 0.003            | 0.003 | 0.001            | 0.001                          | 0.0002 |       |
| EVR3   | Con.                 | 0.62              | 1.82  | 15.13                          | 64.56            | 0.1                           | 2.65             | 5.53  | 0.86             | 5.75                           | 0.11   | 1.74  |
|        | Stat. Err.           | 0.003             | 0.002 | 0.002                          | 0.002            | 0.0002                        | 0.003            | 0.002 | 0.001            | 0.001                          | 0.0002 |       |
| EVR4   | Con.                 | 2.17              | 3.46  | 18.37                          | 54.44            | 0.12                          | 1.1              | 4.6   | 1.35             | 6.93                           | 0.13   | 6.38  |
|        | Stat. Err.           | 0.004             | 0.002 | 0.002                          | 0.002            | 0.0002                        | 0.003            | 0.002 | 0.001            | 0.001                          | 0.0002 |       |
| EVR5   | Con.                 | 2.1               | 2.75  | 17.62                          | 55.05            | 0.16                          | 1.36             | 3.65  | 1.27             | 10.72                          | 0.13   | 4.60  |
|        | Stat. Err.           | 0.004             | 0.002 | 0.002                          | 0.002            | 0.0002                        | 0.003            | 0.002 | 0.001            | 0.001                          | 0.0002 |       |
| EVR6   | Con.                 | 2.05              | 4.4   | 18.72                          | 51.97            | 1.08                          | 1.01             | 5.41  | 1.1              | 7.5                            | 0.13   | 6.06  |
|        | Stat. Err.           | 0.004             | 0.002 | 0.002                          | 0.002            | 0.0002                        | 0.003            | 0.002 | 0.001            | 0.001                          | 0.0002 |       |
| EVR7   | Con.                 | 2.33              | 2.57  | 17.05                          | 59.5             | 0.22                          | 1.79             | 3.36  | 1.4              | 6.96                           | 0.12   | 3.71  |
|        | Stat. Err.           | 0.004             | 0.002 | 0.002                          | 0.002            | 0.0002                        | 0.003            | 0.002 | 0.001            | 0.001                          | 0.0002 |       |
| EVR8   | Con.                 | 1.59              | 3.45  | 19.58                          | 54.93            | 0.42                          | 1.07             | 4.2   | 1.38             | 7.93                           | 0.13   | 5.11  |
|        | Stat. Err.           | 0.004             | 0.002 | 0.002                          | 0.002            | 0.0002                        | 0.003            | 0.002 | 0.001            | 0.001                          | 0.0002 |       |
| EVR9   | Con.                 | 1.57              | 2.69  | 21.04                          | 59.6             | 0.09                          | 2.88             | 1.49  | 1.12             | 5.92                           | 0.08   | 2.36  |
|        | Stat. Err.           | 0.004             | 0.002 | 0.002                          | 0.002            | 0.0001                        | 0.003            | 0.001 | 0.001            | 0.001                          | 0.0001 |       |
| EVR10  | Con.                 | 2.25              | 2.11  | 16.37                          | 58.59            | 0.77                          | 1.99             | 3.25  | 1.36             | 7.65                           | 0.41   | 4.24  |
|        | Stat. Err.           | 0.004             | 0.002 | 0.002                          | 0.002            | 0.0002                        | 0.003            | 0.002 | 0.001            | 0.001                          | 0.0002 |       |
| EVR11  | Con.                 | 1.07              | 2.88  | 14.6                           | 53.41            | 1.61                          | 1.87             | 12.75 | 0.7              | 5.55                           | 0.19   | 4.37  |
|        | Stat. Err.           | 0.004             | 0.002 | 0.002                          | 0.002            | 0.0003                        | 0.003            | 0.003 | 0.001            | 0.001                          | 0.0002 |       |
| EVR12  | Con.                 | 1.48              | 3.44  | 14.55                          | 47.4             | 0.49                          | 1.21             | 17.64 | 0.63             | 5.21                           | 0.11   | 6.06  |
|        | Stat. Err.           | 0.004             | 0.002 | 0.002                          | 0.002            | 0.0002                        | 0.003            | 0.003 | 0.001            | 0.0005                         | 0.0001 |       |
| EVR13  | Con.                 | 0.87              | 2.71  | 14.85                          | 56.36            | 0.86                          | 2.58             | 10.99 | 0.71             | 5.52                           | 0.19   | 2.75  |
|        | Stat. Err.           | 0.004             | 0.002 | 0.002                          | 0.002            | 0.0002                        | 0.003            | 0.003 | 0.001            | 0.001                          | 0.0002 |       |
| EVR14  | Con.                 | 0.68              | 1.82  | 14.83                          | 62.76            | 0.41                          | 2.9              | 6.13  | 0.83             | 5.63                           | 0.13   | 2.21  |
|        | Stat. Err.           | 0.004             | 0.002 | 0.002                          | 0.002            | 0.0002                        | 0.003            | 0.002 | 0.001            | 0.001                          | 0.0002 |       |
| EVR15  | Con.                 | 0.75              | 1.96  | 12.26                          | 71.23            | 0.11                          | 1.57             | 4.81  | 0.76             | 3.86                           | 0.06   | 1.61  |
|        | Stat. Err.           | 0.003             | 0.002 | 0.002                          | 0.002            | 0.0001                        | 0.003            | 0.002 | 0.001            | 0.000                          | 0.0001 |       |
| EVR16  | Con.                 | 0.63              | 2.8   | 12.38                          | 48.26            | 1.45                          | 2.78             | 14.84 | 0.6              | 4.89                           | 0.15   | 10.73 |
|        | Stat. Err.           | 0.004             | 0.002 | 0.002                          | 0.002            | 0.0002                        | 0.003            | 0.003 | 0.001            | 0.000                          | 0.0002 |       |
| EVR17  | Con.                 | 1.23              | 3.02  | 15.49                          | 53.02            | 1.59                          | 1.81             | 12.93 | 0.76             | 6.09                           | 0.21   | 2.69  |
|        | Stat. Err.           | 0.004             | 0.002 | 0.002                          | 0.002            | 0.0003                        | 0.003            | 0.003 | 0.001            | 0.001                          | 0.0002 |       |
| EVR18  | Con.                 | 0.6               | 2.46  | 14.94                          | 58.71            | 0.22                          | 2.74             | 9.88  | 0.75             | 5.58                           | 0.12   | 2.12  |
|        | Stat. Err.           | 0.004             | 0.002 | 0.002                          | 0.002            | 0.0002                        | 0.003            | 0.003 | 0.001            | 0.001                          | 0.0002 |       |
| MER19  | Con.                 | 0.72              | 1.87  | 14.39                          | 51.55            | 4.17                          | 2.82             | 8.48  | 0.78             | 5.73                           | 0.13   | 8.13  |
|        | Stat. Err.           | 0.004             | 0.002 | 0.002                          | 0.002            | 0.0003                        | 0.003            | 0.002 | 0.001            | 0.001                          | 0.0002 |       |
| MER21  | Con.                 | 1.33              | 1.76  | 16.01                          | 59.34            | 0.89                          | 2.27             | 6.71  | 0.95             | 6.51                           | 0.14   | 2.43  |
|        | Stat. Err.           | 0.004             | 0.002 | 0.002                          | 0.002            | 0.0002                        | 0.003            | 0.002 | 0.001            | 0.001                          | 0.0002 |       |
| MER22  | Con.                 | 1.32              | 1.9   | 14.57                          | 61.2             | 1.02                          | 2.01             | 8     | 0.85             | 5.77                           | 0.14   | 1.85  |
|        | Stat. Err.           | 0.004             | 0.002 | 0.002                          | 0.002            | 0.0002                        | 0.003            | 0.002 | 0.001            | 0.001                          | 0.0002 |       |
| MER23  | Con.                 | 1.46              | 1.6   | 15.39                          | 63               | 0.38                          | 1.96             | 4.74  | 1.02             | 6.38                           | 0.14   | 2.65  |
|        | Stat. Err.           | 0.004             | 0.002 | 0.002                          | 0.002            | 0.0002                        | 0.003            | 0.002 | 0.001            | 0.001                          | 0.0002 |       |
| MER24  | Con.                 | 1.18              | 2.48  | 12.83                          | 44.34            | 5.1                           | 1.5              | 15.95 | 0.58             | 4.75                           | 0.24   | 9.24  |
|        | Stat. Err.           | 0.004             | 0.002 | 0.002                          | 0.002            | 0.0004                        | 0.003            | 0.003 | 0.001            | 0.000                          | 0.0002 |       |
| SIL25  | Con.                 | 0.81              | 2.56  | 14.42                          | 57.26            | 1.03                          | 2.53             | 11.52 | 0.72             | 5.36                           | 0.12   | 2.89  |
|        | Stat. Err.           | 0.004             | 0.002 | 0.002                          | 0.002            | 0.0002                        | 0.003            | 0.003 | 0.001            | 0.001                          | 0.0002 |       |
| SIL26  | Con.                 | 1.14              | 2.95  | 14.77                          | 54.08            | 0.15                          | 2                | 13.59 | 0.73             | 5.88                           | 0.12   | 3.72  |
|        | Stat. Err.           | 0.004             | 0.002 | 0.002                          | 0.001            | 0.0002                        | 0.003            | 0.003 | 0.001            | 0.000                          | 0.0001 |       |

| Sample       | Con.(wt%)/Stat. Err. | Na <sub>2</sub> O | MgO   | Al <sub>2</sub> O <sub>3</sub> | SiO <sub>2</sub> | P <sub>2</sub> O <sub>5</sub> | K <sub>2</sub> O | CaO   | TiO <sub>2</sub> | Fe <sub>2</sub> O <sub>3</sub> | MnO    | LOI  |
|--------------|----------------------|-------------------|-------|--------------------------------|------------------|-------------------------------|------------------|-------|------------------|--------------------------------|--------|------|
| <b>SIL27</b> | Con.                 | 0.98              | 2.24  | 14.99                          | 57.28            | 0.61                          | 2.42             | 9.87  | 0.85             | 5.71                           | 0.12   | 3.34 |
|              | Stat. Err.           | 0.004             | 0.002 | 0.002                          | 0.002            | 0.0002                        | 0.003            | 0.003 | 0.001            | 0.001                          | 0.0002 |      |
| <b>SIL28</b> | Con.                 | 0.76              | 4.68  | 16.78                          | 57.14            | 0.12                          | 3.25             | 5.27  | 0.75             | 6.45                           | 0.21   | 3.10 |
|              | Stat. Err.           | 0.004             | 0.002 | 0.002                          | 0.002            | 0.0002                        | 0.003            | 0.002 | 0.001            | 0.001                          | 0.0002 |      |
| <b>SIL29</b> | Con.                 | 0.82              | 4.72  | 17.19                          | 58.21            | 0.1                           | 3.42             | 4.81  | 0.78             | 6.61                           | 0.2    | 2.42 |
|              | Stat. Err.           | 0.004             | 0.002 | 0.002                          | 0.002            | 0.0002                        | 0.003            | 0.002 | 0.001            | 0.001                          | 0.0002 |      |

**Table S4.** Chemical composition of the outer glazed surfaces. Medium Values with standard deviations.

| Outer Glazed Surface - Medium Values with Standard Deviations - Oxides wt% |                          |                   |      |                                |                  |                               |                  |      |                  |      |      |       |
|----------------------------------------------------------------------------|--------------------------|-------------------|------|--------------------------------|------------------|-------------------------------|------------------|------|------------------|------|------|-------|
| Sample                                                                     | Media (wt%)/<br>St. Dev. | Na <sub>2</sub> O | MgO  | Al <sub>2</sub> O <sub>3</sub> | SiO <sub>2</sub> | P <sub>2</sub> O <sub>5</sub> | K <sub>2</sub> O | CaO  | TiO <sub>2</sub> | FeO  | BaO  | PbO   |
| EVR-2                                                                      | Media                    | 0.63              | 0.60 | 4.36                           | 30.77            |                               | 1.67             | 4.18 | 0.15             | 2.35 | 0.89 | 54.40 |
|                                                                            | St. dev.                 | 0.11              | 0.08 | 0.56                           | 2.20             |                               | 0.10             | 0.38 | 0.04             | 0.16 | 0.20 | 2.15  |
| EVR-3                                                                      | Media                    | 0.67              | 1.02 | 5.43                           | 36.59            |                               | 1.83             | 6.41 | 0.55             | 3.46 |      | 44.05 |
|                                                                            | St. dev.                 | 0.02              | 0.03 | 0.04                           | 0.35             |                               | 0.10             | 0.18 | 0.08             | 0.08 |      | 0.04  |
| EVR-11                                                                     | Media                    | 0.79              | 1.22 | 6.07                           | 34.77            |                               | 2.68             | 7.74 | 0.03             | 4.03 | 1.77 | 40.88 |
|                                                                            | St. dev.                 | 0.12              | 0.14 | 0.17                           | 0.36             |                               | 0.06             | 0.16 | 0.02             | 0.19 | 0.18 | 0.45  |
| EVR-12                                                                     | Media                    | 2.00              | 0.75 | 4.08                           | 31.40            |                               | 3.00             | 5.74 | 0.74             | 2.62 |      | 49.67 |
|                                                                            | St. dev.                 | 0.16              | 0.16 | 0.04                           | 0.16             |                               | 0.13             | 0.36 | 0.39             | 0.47 |      | 0.10  |
| EVR-13                                                                     | Media                    | 1.05              | 0.87 | 5.38                           | 34.44            | 0.16                          | 2.48             | 8.07 | 0.89             | 3.46 |      | 43.20 |
|                                                                            | St. dev.                 | 0.05              | 0.13 | 0.10                           | 0.34             | 0.12                          | 0.05             | 0.08 | 0.24             | 0.17 |      | 0.49  |
| EVR-14                                                                     | Media                    | 0.84              | 1.02 | 4.54                           | 32.42            |                               | 2.33             | 6.00 | 0.60             | 3.41 | 0.64 | 48.22 |
|                                                                            | St. dev.                 | 0.15              | 0.22 | 0.13                           | 0.45             |                               | 0.06             | 0.13 | 0.21             | 0.69 | 0.91 | 0.60  |
| EVR-15                                                                     | Media                    | 1.02              | 0.68 | 5.63                           | 36.25            |                               | 1.73             | 5.92 | 0.76             | 3.67 |      | 44.34 |
|                                                                            | St. dev.                 | 0.05              | 0.03 | 0.13                           | 0.36             |                               | 0.04             | 0.16 | 0.13             | 0.09 |      | 0.42  |
| EVR-16                                                                     | Media                    | 0.81              | 0.80 | 4.43                           | 30.78            | 0.04                          | 2.08             | 6.39 | 0.19             | 3.15 | 0.78 | 50.55 |
|                                                                            | St. dev.                 | 0.05              | 0.09 | 0.11                           | 0.21             | 0.06                          | 0.05             | 0.40 | 0.06             | 0.39 | 0.57 | 0.35  |
| EVR-17                                                                     | Media                    | 1.85              | 0.94 | 5.56                           | 34.35            |                               | 3.34             | 6.47 | 0.84             | 3.09 |      | 43.56 |
|                                                                            | St. dev.                 | 0.10              | 0.13 | 0.06                           | 0.81             |                               | 0.13             | 0.32 | 0.16             | 0.35 |      | 0.35  |
| EVR-18                                                                     | Media                    | 0.78              | 0.99 | 5.82                           | 36.43            | 0.13                          | 2.50             | 8.10 | 0.81             | 3.23 |      | 41.22 |
|                                                                            | St. dev.                 | 0.14              | 0.08 | 0.04                           | 1.24             | 0.04                          | 0.31             | 0.30 | 0.10             | 0.58 |      | 1.40  |
| MER-19                                                                     | Media                    | 0.79              | 0.70 | 4.59                           | 28.97            | 0.11                          | 1.68             | 5.15 | 0.08             | 2.37 | 1.69 | 53.88 |
|                                                                            | St. dev.                 | 0.09              | 0.08 | 0.20                           | 1.04             | 0.02                          | 0.06             | 0.37 | 0.02             | 0.57 | 0.57 | 1.39  |
| MER-21                                                                     | Media                    | 0.69              | 0.74 | 4.28                           | 33.27            | 0.04                          | 1.00             | 3.86 | 0.42             | 2.93 |      | 52.77 |
|                                                                            | St. dev.                 | 0.03              | 0.06 | 0.13                           | 0.34             | 0.03                          | 0.07             | 0.27 | 0.09             | 0.33 |      | 0.31  |
| MER-22                                                                     | Media                    | 1.10              | 1.04 | 6.25                           | 38.79            | 0.16                          | 2.06             | 9.14 | 0.17             | 4.06 | 1.55 | 35.70 |
|                                                                            | St. dev.                 | 0.04              | 0.05 | 0.29                           | 0.40             | 0.11                          | 0.11             | 0.26 | 0.05             | 0.46 | 0.14 | 0.44  |
| MER-23                                                                     | Media                    | 0.73              | 0.79 | 5.78                           | 35.61            |                               | 1.44             | 5.93 | 0.84             | 3.68 |      | 45.21 |
|                                                                            | St. dev.                 | 0.07              | 0.11 | 0.40                           | 0.85             |                               | 0.07             | 0.09 | 0.09             | 0.15 |      | 1.49  |
| MER-24                                                                     | Media                    | 1.69              | 0.78 | 4.22                           | 30.79            | 0.23                          | 3.12             | 5.48 | 0.03             | 2.92 | 1.73 | 49.02 |
|                                                                            | St. dev.                 | 0.12              | 0.12 | 0.05                           | 0.70             | 0.13                          | 0.19             | 0.34 | 0.02             | 0.06 | 0.34 | 0.33  |
| SIL-25                                                                     | Media                    | 0.70              | 1.03 | 6.00                           | 35.85            | 0.14                          | 2.50             | 7.47 | 0.05             | 3.48 | 1.99 | 40.79 |
|                                                                            | St. dev.                 | 0.06              | 0.12 | 0.19                           | 0.46             | 0.07                          | 0.07             | 0.27 | 0.01             | 0.05 | 0.59 | 1.16  |
| SIL-26                                                                     | Media                    | 0.74              | 1.34 | 5.72                           | 34.07            |                               | 2.66             | 9.32 | 0.89             | 3.73 |      | 41.52 |
|                                                                            | St. dev.                 | 0.13              | 0.03 | 0.16                           | 0.54             |                               | 0.07             | 0.31 | 0.10             | 0.72 |      | 0.64  |
| SIL-27                                                                     | Media                    | 0.85              | 0.61 | 4.28                           | 30.26            |                               | 1.80             | 5.79 | 0.74             | 3.02 |      | 52.64 |
|                                                                            | St. dev.                 | 0.15              | 0.09 | 0.20                           | 1.19             |                               | 0.18             | 0.19 | 0.07             | 0.29 |      | 1.86  |
| SIL-28                                                                     | Media                    | 0.57              | 1.09 | 5.24                           | 35.79            | 0.11                          | 1.57             | 5.47 | 0.09             | 3.12 | 1.84 | 45.10 |
|                                                                            | St. dev.                 | 0.05              | 0.14 | 0.11                           | 0.41             | 0.06                          | 0.10             | 0.24 | 0.05             | 0.55 | 0.80 | 0.34  |
| SIL-29                                                                     | Media                    | 0.74              | 1.24 | 5.91                           | 35.65            | 0.23                          | 1.67             | 6.32 | 0.12             | 3.37 | 1.21 | 43.55 |
|                                                                            | St. dev.                 | 0.16              | 0.12 | 0.12                           | 0.30             | 0.08                          | 0.07             | 0.38 | 0.09             | 0.14 | 0.54 | 0.51  |

**Table S5.** Chemical composition of the inner glazed surfaces. Medium Values with Standard Deviations.

| Inner Glazed chemical composition - Medium Values with Standard Deviations - Oxides wt% |                             |                                                                                 |         |                        |                  |                       |                     |         |          |         |         |         |           |
|-----------------------------------------------------------------------------------------|-----------------------------|---------------------------------------------------------------------------------|---------|------------------------|------------------|-----------------------|---------------------|---------|----------|---------|---------|---------|-----------|
| Sample                                                                                  | Media<br>(wt%)/<br>St. Dev. | Na <sub>2</sub><br>O                                                            | Mg<br>O | Al <sub>2</sub> O<br>3 | SiO <sub>2</sub> | P <sub>2</sub> O<br>5 | K <sub>2</sub><br>O | Ca<br>O | TiO<br>2 | Mn<br>O | Fe<br>O | Ba<br>O | PbO       |
| EVR-2                                                                                   | Media                       | 0.64                                                                            | 0.56    | 5.26                   | 36.0<br>7        |                       | 1.60                | 4.30    | 0.12     |         | 2.24    | 0.84    | 48.3<br>6 |
|                                                                                         | St. dev.                    | 0.05                                                                            | 0.10    | 0.12                   | 0.91             |                       | 0.05                | 0.10    | 0.12     |         | 0.06    | 0.22    | 0.86      |
| EVR-3                                                                                   | Media                       | 0.57                                                                            | 0.83    | 7.37                   | 42.6<br>8        |                       | 1.70                | 5.87    | 0.74     |         | 3.75    |         | 36.4<br>9 |
|                                                                                         | St. dev.                    | 0.08                                                                            | 0.09    | 0.09                   | 0.25             |                       | 0.10                | 0.17    | 0.18     |         | 0.42    |         | 0.11      |
| EVR-9                                                                                   |                             | Just data for the outer surface, tripod, the piece has no inner glaze           |         |                        |                  |                       |                     |         |          |         |         |         |           |
| EVR-11                                                                                  | Media                       | 0.85                                                                            | 0.86    | 7.15                   | 38.8<br>8        |                       | 2.27                | 6.98    | 0.64     |         | 4.48    |         | 37.9<br>0 |
|                                                                                         | St. dev.                    | 0.07                                                                            | 0.12    | 0.13                   | 0.65             |                       | 0.05                | 0.24    | 0.21     |         | 0.19    |         | 0.42      |
| EVR-12                                                                                  | Media                       | 1.99                                                                            | 1.11    | 5.91                   | 39.9<br>2        |                       | 3.63                | 6.24    | 0.86     |         | 2.68    |         | 37.6<br>4 |
|                                                                                         | St. dev.                    | 0.18                                                                            | 0.10    | 0.29                   | 0.34             |                       | 0.12                | 0.19    | 0.14     |         | 0.43    |         | 0.36      |
| EVR-13                                                                                  | Media                       | 0.92                                                                            | 0.79    | 6.19                   | 38.4<br>9        |                       | 2.01                | 6.72    | 0.88     |         | 2.97    |         | 41.0<br>3 |
|                                                                                         | St. dev.                    | 0.03                                                                            | 0.04    | 0.15                   | 0.35             |                       | 0.08                | 0.19    | 0.36     |         | 0.16    |         | 0.44      |
| EVR-14                                                                                  | Media                       | 0.95                                                                            | 0.51    | 5.57                   | 37.2<br>5        |                       | 1.80                | 4.50    | 0.88     |         | 2.52    |         | 46.0<br>3 |
|                                                                                         | St. dev.                    | 0.12                                                                            | 0.10    | 0.13                   | 0.20             |                       | 0.08                | 0.08    | 0.11     |         | 0.09    |         | 0.08      |
| EVR-15                                                                                  | Media                       | 0.57                                                                            | 0.62    | 5.48                   | 35.9<br>5        |                       | 1.24                | 4.87    | 0.62     |         | 2.51    | 0.51    | 47.6<br>4 |
|                                                                                         | St. dev.                    | 0.09                                                                            | 0.08    | 0.07                   | 1.07             |                       | 0.06                | 0.11    | 0.33     |         | 0.27    | 0.72    | 1.20      |
| EVR-16                                                                                  | Media                       | 0.61                                                                            | 0.68    | 5.46                   | 36.0<br>5        | 0.13                  | 1.85                | 5.45    | 0.01     |         | 2.50    | 1.66    | 45.6<br>0 |
|                                                                                         | St. dev.                    | 0.09                                                                            | 0.10    | 0.54                   | 0.90             | 0.10                  | 0.08                | 0.08    | 0.02     |         | 0.38    | 0.21    | 1.30      |
| EVR-17                                                                                  | Media                       | 1.50                                                                            | 1.17    | 6.71                   | 37.5<br>2        |                       | 2.47                | 5.85    | 0.64     |         | 3.36    |         | 40.7<br>8 |
|                                                                                         | St. dev.                    | 0.13                                                                            | 0.28    | 0.16                   | 0.34             |                       | 0.24                | 0.25    | 0.45     |         | 1.31    |         | 0.58      |
| EVR-18                                                                                  | Media                       | 0.76                                                                            | 0.73    | 6.80                   | 39.7<br>7        |                       | 2.19                | 6.93    | 1.00     |         | 3.56    |         | 38.1<br>7 |
|                                                                                         | St. dev.                    | 0.14                                                                            | 0.13    | 0.09                   | 0.74             | 0.08                  | 0.12                | 0.22    | 0.08     |         | 0.75    |         | 0.66      |
| MER-19                                                                                  |                             | Just data for the outer surface, bowl, just analysed the black/brown decoration |         |                        |                  |                       |                     |         |          |         |         |         |           |
| MER-21                                                                                  | Media                       | 0.54                                                                            | 0.67    | 5.71                   | 37.5<br>9        | 0.08                  | 0.81                | 3.46    | 0.64     |         | 2.49    | 0.71    | 47.3<br>0 |
|                                                                                         | St. dev.                    | 0.22                                                                            | 0.06    | 0.13                   | 0.52             | 0.09                  | 0.06                | 0.04    | 0.51     |         | 0.12    | 0.51    | 0.36      |
| MER-22                                                                                  | Media                       | 0.90                                                                            | 0.77    | 7.07                   | 44.3<br>6        | 0.19                  | 1.59                | 6.60    | 1.00     | 0.18    | 3.55    |         | 33.7<br>9 |
|                                                                                         | St. dev.                    | 0.02                                                                            | 0.10    | 0.14                   | 0.24             | 0.03                  | 0.11                | 0.06    | 0.40     | 0.25    | 0.16    |         | 0.32      |
| MER-23                                                                                  |                             | Just data for the outer surface, jug, no glaze in the inside of the piece       |         |                        |                  |                       |                     |         |          |         |         |         |           |
| MER-24                                                                                  | Media                       | 1.17                                                                            | 1.04    | 6.47                   | 36.5<br>5        | 0.27                  | 2.46                | 7.93    | 1.30     |         | 2.83    |         | 39.9<br>7 |



|        |          |      |      |      |           |      |      |      |      |  |      |      |           |
|--------|----------|------|------|------|-----------|------|------|------|------|--|------|------|-----------|
|        | St. dev. | 0.06 | 0.14 | 0.14 | 0.29      | 0.08 | 0.10 | 0.38 | 0.72 |  | 0.38 |      | 1.07      |
| SIL-25 | Media    | 0.75 | 0.74 | 6.78 | 38.6<br>5 | 0.11 | 1.92 | 6.31 | 0.18 |  | 2.85 | 0.86 | 40.8<br>6 |
|        | St. dev. | 0.02 | 0.07 | 0.17 | 0.18      | 0.01 | 0.06 | 0.12 | 0.10 |  | 0.11 | 0.09 | 0.41      |
| SIL-26 | Media    | 0.99 | 1.03 | 7.59 | 39.9<br>4 |      | 2.20 | 7.59 | 1.59 |  | 3.94 |      | 35.1<br>3 |
|        | St. dev. | 0.21 | 0.38 | 0.33 | 0.49      |      | 0.09 | 0.37 | 0.07 |  | 0.20 |      | 0.93      |
| SIL-27 | Media    | 0.95 | 0.80 | 7.15 | 40.2<br>5 |      | 2.03 | 6.46 | 0.72 |  | 2.72 |      | 38.9<br>3 |
|        | St. dev. | 0.10 | 0.10 | 0.10 | 0.50      |      | 0.19 | 0.13 | 0.11 |  | 0.26 |      | 0.51      |
| SIL-28 | Media    | 0.69 | 0.93 | 6.36 | 40.0<br>3 | 0.09 | 1.38 | 4.84 | 0.84 |  | 2.78 |      | 42.0<br>5 |
|        | St. dev. | 0.17 | 0.16 | 0.29 | 0.54      | 0.06 | 0.08 | 0.24 | 0.05 |  | 0.26 |      | 0.69      |
| SIL-29 | Media    | 0.68 | 0.86 | 6.18 | 40.2<br>4 | 0.09 | 1.61 | 5.18 | 0.10 |  | 2.60 | 0.97 | 41.4<br>9 |
|        | St. dev. | 0.11 | 0.16 | 0.20 | 0.09      | 0.07 | 0.06 | 0.08 | 0.06 |  | 0.02 | 0.21 | 0.06      |

**Table S6.** Chemical composition of samples black/brown glazes. Medium values with standard deviations.

| Black/brown glazes chemical composition - Medium Values with Standard Deviations of clean areas- Oxides wt% |        |                            |                      |         |                                |                  |                               |                     |         |                  |         |           |         |           |
|-------------------------------------------------------------------------------------------------------------|--------|----------------------------|----------------------|---------|--------------------------------|------------------|-------------------------------|---------------------|---------|------------------|---------|-----------|---------|-----------|
| Sample                                                                                                      | P<br>F | Media<br>(wt%)/<br>St.dev. | Na <sub>2</sub><br>O | Mg<br>O | Al <sub>2</sub> O <sub>3</sub> | SiO <sub>2</sub> | P <sub>2</sub> O <sub>5</sub> | K <sub>2</sub><br>O | Ca<br>O | TiO <sub>2</sub> | Mn<br>O | FeO       | Ba<br>O | PbO       |
| EVR-2                                                                                                       | 6      | Media                      | 0.43                 | 0.55    | 6.08                           | 35.5<br>0        | 0.16                          | 2.3<br>9            | 4.38    | 0.32             | 2.51    | 1.34      | 0.57    | 45.7<br>8 |
|                                                                                                             |        | St dev                     | 0.09                 | 0.07    | 0.43                           | 0.55             | 0.13                          | 0.2<br>5            | 0.30    | 0.30             | 0.43    | 0.26      | 0.49    | 1.08      |
| EVR-3                                                                                                       | 2      | Media                      | 0.53                 | 1.06    | 7.71                           | 42.0<br>1        | 0.06                          | 2.0<br>0            | 5.23    | 1.08             | 0.50    | 2.56      |         | 37.2<br>5 |
|                                                                                                             |        | st dev                     | 0.12                 | 0.22    | 0.17                           | 0.98             | 0.03                          | 0.1<br>0            | 0.11    | 0.24             | 0.14    | 0.22      |         | 1.61      |
| EVR-11                                                                                                      | 3      | Media                      | 0.63                 | 0.86    | 5.86                           | 34.9<br>3        |                               | 1.7<br>2            | 6.31    | 0.10             | 0.00    | 7.12      | 1.82    | 40.6<br>4 |
|                                                                                                             |        | St dev                     | 0.23                 | 0.14    | 0.64                           | 1.22             |                               | 0.2<br>9            | 0.41    | 0.07             | 0.00    | 0.64      | 0.39    | 2.50      |
| EVR-12                                                                                                      | 4      | Media                      | 1.52                 | 0.93    | 4.80                           | 34.7<br>6        | 0.31                          | 2.2<br>5            | 5.22    | 0.84             | 3.14    | 2.18      |         | 44.0<br>6 |
|                                                                                                             |        | St dev                     | 0.02                 | 0.16    | 0.27                           | 0.74             | 0.15                          | 0.1<br>6            | 0.65    | 0.24             | 1.07    | 0.37      |         | 0.82      |
| EVR-14                                                                                                      | 2      | Media                      | 0.51                 | 0.75    | 8.09                           | 41.5<br>6        | 0.07                          | 2.6<br>8            | 4.36    | 0.06             | 2.46    | 1.84      | 1.59    | 36.0<br>4 |
|                                                                                                             |        | St dev                     | 0.12                 | 0.26    | 0.16                           | 0.10             | 0.02                          | 0.1<br>4            | 0.27    | 0.07             | 0.32    | 0.22      | 0.63    | 0.96      |
| EVR-17                                                                                                      | 3      | Media                      | 1.46                 | 0.93    | 6.28                           | 35.0<br>1        | 0.28                          | 2.0<br>6            | 5.95    | 0.50             | 1.51    | 3.78      | 0.45    | 41.8<br>0 |
|                                                                                                             |        | St dev                     | 0.20                 | 0.30    | 0.30                           | 0.90             | 0.02                          | 0.0<br>2            | 0.43    | 0.40             | 0.13    | 0.46      | 0.63    | 1.26      |
| MER-19                                                                                                      | 6      | Media                      | 0.68                 | 0.78    | 6.00                           | 36.2<br>7        | 0.17                          | 1.7<br>3            | 5.13    | 0.15             | 1.80    | 2.80      | 1.00    | 43.4<br>9 |
|                                                                                                             |        | St dev                     | 0.15                 | 0.09    | 0.12                           | 0.35             | 0.09                          | 0.1<br>8            | 0.03    | 0.08             | 0.38    | 0.32      | 0.67    | 1.99      |
| SIL-25                                                                                                      | 3      | Media                      | 0.48                 | 0.84    | 7.23                           | 38.4<br>8        | 0.19                          | 3.0<br>5            | 5.67    | 0.09             | 0.90    | 3.54      | 0.91    | 38.6<br>3 |
|                                                                                                             |        | St dev                     | 0.07                 | 0.09    | 0.24                           | 0.61             | 0.12                          | 0.1<br>5            | 0.25    | 0.09             | 0.08    | 0.24      | 0.36    | 0.31      |
| SIL-26                                                                                                      | 3      | Media                      | 0.55                 | 0.93    | 5.85                           | 33.0<br>5        | 0.08                          | 1.8<br>1            | 6.12    | 0.39             | 2.67    | 10.3<br>7 | 1.32    | 36.8<br>7 |
|                                                                                                             |        | St dev                     | 0.21                 | 0.22    | 0.38                           | 2.56             | 0.13                          | 0.3<br>2            | 0.53    | 0.16             | 0.75    | 2.19      | 0.24    | 1.87      |
| SIL-27                                                                                                      | 2      | Media                      | 0.85                 | 0.96    | 6.84                           | 40.3<br>4        | 0.06                          | 2.1<br>4            | 6.03    | 0.29             | 1.12    | 2.01      | 0.63    | 38.7<br>3 |
|                                                                                                             |        | St dev                     | 0.06                 | 0.22    | 0.70                           | 1.51             | 0.09                          | 0.2<br>0            | 0.14    | 0.08             | 0.43    | 0.34      | 0.17    | 1.20      |
| SIL-28                                                                                                      | 6      | Media                      | 0.52                 | 0.83    | 5.37                           | 36.4<br>9        | 0.13                          | 1.1<br>3            | 4.83    | 0.19             | 0.59    | 3.35      | 1.29    | 45.2<br>9 |
|                                                                                                             |        | St dev                     | 0.07                 | 0.05    | 0.48                           | 0.77             | 0.10                          | 0.1<br>5            | 0.13    | 0.23             | 0.42    | 0.16      | 0.92    | 1.48      |
| SIL-29                                                                                                      | 6      | Media                      | 0.75                 | 0.84    | 6.26                           | 38.1<br>4        | 0.25                          | 1.6<br>5            | 5.08    | 0.29             | 0.52    | 3.81      | 0.95    | 41.4<br>4 |

|  |  |        |      |      |      |      |      |                 |      |      |      |      |      |      |
|--|--|--------|------|------|------|------|------|-----------------|------|------|------|------|------|------|
|  |  | St dev | 0.05 | 0.07 | 0.48 | 0.58 | 0.05 | $\frac{0.1}{9}$ | 0.05 | 0.00 | 0.40 | 0.44 | 0.19 | 0.74 |
|--|--|--------|------|------|------|------|------|-----------------|------|------|------|------|------|------|

**Table S7.** Chemical composition of samples ceramic paste obtained by SEM-EDS. Medium values with standard deviation.

| Sample | Media /<br>St. Dev. | Na <sub>2</sub> O | MgO  | Al <sub>2</sub> O <sub>3</sub> | SiO <sub>2</sub> | P <sub>2</sub> O <sub>5</sub> | SO <sub>2</sub> | K <sub>2</sub> O | CaO   | TiO <sub>2</sub> | MnO  | FeO  | BaO | PbO  |
|--------|---------------------|-------------------|------|--------------------------------|------------------|-------------------------------|-----------------|------------------|-------|------------------|------|------|-----|------|
| EVR-2  | Media               | 0.80              | 2.22 | 15.68                          | 58.76            | 0.30                          |                 | 2.99             | 12.12 | 1.15             |      | 5.99 |     |      |
|        | St dev              | 0.11              | 0.07 | 0.89                           | 2.09             | 0.21                          |                 | 0.22             | 0.69  | 0.26             |      | 0.61 |     |      |
| EVR-3  | Media               | 0.73              | 1.69 | 15.87                          | 64.20            | 0.18                          | 0.62            | 3.08             | 7.02  | 0.83             |      | 5.78 |     |      |
|        | St dev              | 0.07              | 0.14 | 0.89                           | 0.19             | 0.13                          | 0.16            | 0.63             | 1.30  | 0.10             |      | 0.11 |     |      |
| EVR-9  | Media               | 1.62              | 2.38 | 21.11                          | 63.69            |                               |                 | 2.54             | 1.96  | 0.96             |      | 5.73 |     |      |
|        | St dev              | 0.46              | 0.17 | 2.96                           | 4.71             |                               |                 | 0.14             | 0.38  | 0.28             |      | 0.62 |     |      |
| EVR-11 | Media               | 1.55              | 3.02 | 16.36                          | 55.76            |                               | 0.51            | 1.99             | 14.31 | 0.73             |      | 5.77 |     |      |
|        | St dev              | 0.22              | 0.08 | 0.34                           | 0.74             |                               | 0.15            | 0.14             | 0.41  | 0.17             |      | 0.23 |     |      |
| EVR-12 | Media               | 1.87              | 3.14 | 15.95                          | 51.58            | 0.30                          | 0.43            | 1.56             | 18.38 | 1.14             |      | 5.64 |     |      |
|        | St dev              | 0.19              | 0.06 | 0.21                           | 0.63             | 0.22                          | 0.19            | 0.28             | 1.11  | 0.14             |      | 0.28 |     |      |
| EVR-13 | Media               | 0.82              | 2.72 | 16.41                          | 56.43            | 0.27                          | 0.66            | 2.65             | 13.04 | 1.15             |      | 5.85 |     |      |
|        | St dev              | 0.05              | 0.20 | 0.83                           | 1.63             | 0.11                          | 0.03            | 0.22             | 0.66  | 0.13             |      | 0.58 |     |      |
| EVR-14 | Media               | 0.97              | 1.82 | 16.40                          | 61.65            | 0.21                          | 0.17            | 3.10             | 8.82  | 1.09             |      | 5.78 |     |      |
|        | St dev              | 0.02              | 0.32 | 0.46                           | 1.00             | 0.30                          | 0.24            | 0.40             | 0.53  | 0.30             |      | 0.53 |     |      |
| EVR-15 | Media               | 0.78              | 2.01 | 13.32                          | 70.38            |                               |                 | 1.79             | 6.00  | 0.94             |      | 4.79 |     |      |
|        | St dev              | 0.13              | 0.14 | 0.07                           | 0.37             |                               |                 | 0.26             | 0.12  | 0.05             |      | 0.47 |     |      |
| EVR-16 | Media               | 0.97              | 2.51 | 14.08                          | 46.71            | 0.74                          |                 | 2.71             | 26.18 | 0.69             |      | 5.40 |     |      |
|        | St dev              | 0.17              | 0.05 | 0.46                           | 1.58             | 0.59                          |                 | 0.23             | 1.07  | 0.11             |      | 0.20 |     |      |
| EVR-17 | Media               | 1.79              | 2.76 | 16.65                          | 54.71            | 0.28                          | 0.82            | 1.94             | 13.69 | 0.86             |      | 6.51 |     |      |
|        | St dev              | 0.16              | 0.12 | 0.55                           | 1.63             | 0.11                          | 0.08            | 0.21             | 0.65  | 0.21             |      | 0.48 |     |      |
| EVR-18 | Media               | 0.87              | 2.43 | 17.36                          | 55.59            | 0.16                          |                 | 2.83             | 13.43 | 0.91             |      | 5.47 |     | 0.96 |
|        | St dev              | 0.11              | 0.03 | 0.72                           | 1.69             | 0.12                          |                 | 0.12             | 0.54  | 0.04             |      | 0.52 |     | 0.18 |
| MER-19 | Media               | 0.70              | 2.10 | 16.41                          | 52.31            | 5.30                          |                 | 3.24             | 11.76 | 1.05             |      | 7.13 |     |      |
|        | St dev              | 0.17              | 0.12 | 0.47                           | 0.64             | 0.87                          |                 | 0.41             | 0.20  | 0.31             |      | 0.38 |     |      |
| MER-21 | Media               | 1.71              | 1.74 | 17.62                          | 57.38            | 0.93                          | 0.66            | 2.79             | 8.51  | 1.26             | 0.53 | 6.87 |     |      |
|        | St dev              | 0.16              | 0.23 | 1.29                           | 2.95             | 0.16                          | 0.10            | 0.68             | 0.50  | 0.23             | 0.25 | 0.05 |     |      |
| MER-22 | Media               | 1.58              | 2.04 | 16.62                          | 55.86            | 0.84                          | 0.24            | 1.84             | 12.86 | 0.88             |      | 6.73 |     | 0.52 |
|        | St dev              | 0.22              | 0.10 | 0.70                           | 1.21             | 0.72                          | 0.34            | 0.14             | 0.37  | 0.07             |      | 0.56 |     | 0.39 |
| MER-23 | Media               | 1.98              | 1.60 | 18.20                          | 61.00            | 0.28                          | 0.16            | 2.12             | 6.10  | 1.37             | 0.04 | 7.06 |     | 0.10 |
|        | St dev              | 0.09              | 0.10 | 0.32                           | 1.16             | 0.09                          | 0.14            | 0.09             | 1.09  | 0.23             | 0.05 | 0.38 |     | 0.14 |
| MER-24 | Media               | 1.64              | 3.23 | 14.83                          | 46.51            | 0.81                          |                 | 1.39             | 25.23 | 0.98             |      | 5.38 |     |      |
|        | St dev              | 0.23              | 0.30 | 0.27                           | 1.97             | 0.20                          |                 | 0.05             | 1.94  | 0.15             |      | 0.10 |     |      |
| SIL-25 | Media               | 0.93              | 2.98 | 16.38                          | 53.88            | 0.52                          | 0.34            | 2.42             | 15.80 | 0.80             |      | 5.95 |     |      |
|        | St dev              | 0.05              | 0.04 | 0.64                           | 1.36             | 0.12                          | 0.13            | 0.07             | 0.21  | 0.26             |      | 0.35 |     |      |
| SIL-26 | Media               | 1.24              | 3.29 | 16.10                          | 50.27            | 0.29                          | 0.49            | 1.97             | 17.28 | 1.02             |      | 8.06 |     |      |
|        | St dev              | 0.10              | 0.14 | 0.57                           | 1.06             | 0.04                          | 0.23            | 0.21             | 0.80  | 0.33             |      | 0.77 |     |      |
| SIL-27 | Media               | 0.99              | 2.99 | 17.28                          | 52.32            | 0.52                          | 0.38            | 1.65             | 16.27 | 0.94             |      | 6.65 |     |      |
|        | St dev              | 0.30              | 0.47 | 0.10                           | 1.61             | 0.11                          | 0.11            | 0.47             | 1.76  | 0.09             |      | 0.39 |     |      |
| SIL-28 | Media               | 1.13              | 4.41 | 17.45                          | 60.04            | 0.26                          | 0.20            | 3.48             | 6.48  | 0.83             |      | 5.71 |     |      |

| Sample | Media /<br>St. Dev. | Na <sub>2</sub> O | MgO  | Al <sub>2</sub> O <sub>3</sub> | SiO <sub>2</sub> | P <sub>2</sub> O <sub>5</sub> | SO <sub>2</sub> | K <sub>2</sub> O | CaO  | TiO <sub>2</sub> | MnO  | FeO  | BaO  | PbO |
|--------|---------------------|-------------------|------|--------------------------------|------------------|-------------------------------|-----------------|------------------|------|------------------|------|------|------|-----|
|        | St dev              | 0,14              | 0,42 | 0,86                           | 0,44             | 0,05                          | 0,07            | 0,29             | 0,92 | 0,09             |      | 0,07 |      |     |
| SIL-29 | Media               | 0,93              | 4,48 | 18,10                          | 59,46            | 0,08                          | 0,05            | 3,55             | 5,87 | 0,72             | 0,28 | 6,21 | 0,28 |     |
|        | St dev              | 0,13              | 0,33 | 0,93                           | 1,81             | 0,12                          | 0,07            | 0,11             | 0,08 | 0,15             | 0,15 | 0,48 | 0,39 |     |
